# Supplementary material for: An assessment of the nutritional status of children under five years in Maputaland, Kwa-Zulu-Natal
Source: Springer Nature journal article supplement (doi:10.1038/s41467-017-00856-2), 2001-01-01
Supplement: MOESM3 [file 41467_2017_856_MOESM3_ESM.pdf]

## **Description of Additional Supplementary Files**

File Name: Supplementary Movie 1

Description: Animation of our proposed motionless volumetric spatially invariant resolution photoacoustic microscopy.

File Name: Supplementary Movie 2

Description: Volume-rendered images of carbon fibers.

File Name: Supplementary Movie 3

Description: Volumetric imaging of zebrafish larvae *in vivo*.
